# Supplementary material for: The Etiology of Childhood Pneumonia in Bangladesh: Findings From the Pneumonia Etiology Research for Child Health (PERCH) Study
Source: PubMed Central journal article supplement — Pediatr Infect Dis J. 2021 Aug 25;40(9):S79–90. doi: 10.1097/INF.0000000000002648 (PMC8448409; doi:10.1097/inf.0000000000002648), 2021-08-25
Supplement: inf-40-s79-s001.pdf [file inf-40-s79-s001.pdf]

## Supplemental Digital Content 1

For more information about the sensitivity priors in the PERCH Integrated Etiology Analysis refer to [Appendix Section III B 6 in The PERCH Study Group. Causes of severe pneumonia requiring hospital admission in children without HIV infection from Africa and Asia: the PERCH multi-country case-control study. Lancet. 2019; 6736\(19\):1-23.](#)

**Table: Integrated etiology analysis input values for sensitivity and specificity of laboratory test measures**

| Specimen/test               | Pathogen                                                                                                                                                                             | Sensitivity Prior <sup>a</sup> |                      | Specificity                              |
|-----------------------------|--------------------------------------------------------------------------------------------------------------------------------------------------------------------------------------|--------------------------------|----------------------|------------------------------------------|
|                             |                                                                                                                                                                                      | Base <sup>b</sup>              | Reduced <sup>b</sup> |                                          |
| Blood cultures <sup>c</sup> | - <i>Streptococcus pneumoniae</i><br>- <i>Haemophilus influenzae</i>                                                                                                                 | 5-20%                          | 1-13%                | 100%                                     |
|                             | - <i>Moraxella catarrhalis</i><br>- <i>Staphylococcus aureus</i><br>-Nonfermentative gram-negative rods<br>-Candida species<br>-Non-pneumococcal streptococci, including enterococci | 5-15%                          | 1-10%                |                                          |
|                             | Salmonella species<br>Enterobacteriaceae<br><i>Neisseria meningitidis</i>                                                                                                            | 10-50%                         | 1-34%                |                                          |
|                             |                                                                                                                                                                                      |                                |                      |                                          |
| NP/OP PCR                   | - <i>Streptococcus pneumoniae</i><br>- <i>Haemophilus influenzae</i>                                                                                                                 | 50-90%                         | 15-55%               | 1 – Control prevalence (ref SDC Table 4) |
|                             | -Salmonella species<br>-Legionella species                                                                                                                                           | 0.5-90%                        | 0.5-90%              |                                          |
|                             | -All other PCR targets                                                                                                                                                               | 50-90%                         | 50-90%               |                                          |
| Whole blood PCR             | - <i>Streptococcus pneumoniae</i>                                                                                                                                                    | 12-65%                         | 12-65%               | 1 – Control prevalence (ref SDC Table 4) |
| Induced sputum              | - <i>Mycobacterium tuberculosis</i>                                                                                                                                                  | 10-30%                         | 10-30%               | 100%                                     |

Abbreviation: SDC, Supplemental Digital Content.

a. Background information supporting choice of sensitivity priors provided in the all-site PERCH paper.

b. Base: > 1.5 mL blood culture volume (blood culture only) and no evidence of prior antibiotic exposure. Reduced ≤ 1.5 mL or evidence of prior antibiotic exposure.

c. Direct evidence of the diagnostic sensitivity for *Streptococcus pneumoniae* and *Haemophilus influenzae* from vaccine probe studies. For all other pathogens we set the base blood culture sensitivity prior to 5-15%, with the exception of Salmonella species, Enterobacteriaceae and *Neisseria meningitidis*, for which we selected wider priors (10-50%) to reflect their greater uncertainty.
