# Supplementary material for: The Etiology of Childhood Pneumonia in Bangladesh: Findings From the Pneumonia Etiology Research for Child Health (PERCH) Study
Source: PubMed Central journal article supplement — Pediatr Infect Dis J. 2021 Aug 25;40(9):S79–90. doi: 10.1097/INF.0000000000002648 (PMC8448409; doi:10.1097/inf.0000000000002648), 2021-08-25
Supplement: inf-40-s79-s002.pdf [file inf-40-s79-s002.pdf]

**Supplemental Digital Content 2, Table. Demographic and Clinical Characteristics of Cases and Controls, by Site**

|                                                                                            | Matlab     |                                 |             | Dhaka        |                                 |            |
|--------------------------------------------------------------------------------------------|------------|---------------------------------|-------------|--------------|---------------------------------|------------|
|                                                                                            | All Cases  | CXR-positive Cases <sup>a</sup> | Controls    | All Cases    | CXR-positive Cases <sup>a</sup> | Controls   |
| <b>All</b>                                                                                 | 327        | 101                             | 418         | 198          | 118                             | 354        |
| <b>Age</b>                                                                                 |            |                                 |             |              |                                 |            |
| <b>Median age in months (IQR)</b>                                                          | 11 (5, 21) | 12 (6, 23)                      | 9.5 (5, 22) | 12.5 (6, 20) | 12 (6, 20)                      | 15 (6, 26) |
| <b>1 - 5 m</b>                                                                             | 94 (28.7)  | 25 (24.8)                       | 151 (36.1)  | 42 (21.2)    | 25 (21.2)                       | 70 (19.8)  |
| <b>6 - 11 m</b>                                                                            | 74 (22.6)  | 22 (21.8)                       | 87 (20.8)   | 47 (23.7)    | 28 (23.7)                       | 81 (22.9)  |
| <b>12 - 23 m</b>                                                                           | 96 (29.4)  | 29 (28.7)                       | 85 (20.3)   | 82 (41.4)    | 52 (44.1)                       | 111 (31.4) |
| <b>24 - 59 m</b>                                                                           | 63 (19.3)  | 25 (24.8)                       | 95 (22.7)   | 27 (13.6)    | 13 (11.0)                       | 92 (26.0)  |
| <b>Female</b>                                                                              | 114 (34.9) | 37 (36.6)                       | 208 (49.8)  | 77 (38.9)    | 50 (42.4)                       | 194 (54.8) |
| <b>Season of enrollment</b>                                                                |            |                                 |             |              |                                 |            |
| <b>Monsoon (June–October)</b>                                                              | 163 (49.8) | 54 (53.5)                       | 157 (37.6)  | 107 (54.0)   | 65 (55.1)                       | 163 (46)   |
| <b>Dry (November–May)</b>                                                                  | 164 (50.2) | 47 (46.5)                       | 261 (62.4)  | 91 (46.0)    | 53 (44.9)                       | 191 (54)   |
| <b>Respiratory tract illness<sup>b</sup> (controls only)</b>                               | n/a        | n/a                             | 131 (31.3)  | n/a          | n/a                             | 38 (10.7)  |
| <b>Number of Pentavalent vaccine doses received<sup>c</sup></b>                            |            |                                 |             |              |                                 |            |
| <b>None</b>                                                                                | 16 (4.9)   | 3 (3.0)                         | 3 (0.7)     | 10 (5.1)     | 5 (4.3)                         | 9 (2.5)    |
| <b>1</b>                                                                                   | 30 (9.2)   | 10 (9.9)                        | 13 (3.2)    | 19 (9.7)     | 10 (8.5)                        | 19 (5.4)   |
| <b>2</b>                                                                                   | 14 (4.3)   | 2 (2.0)                         | 36 (8.7)    | 16 (8.2)     | 10 (8.5)                        | 36 (10.2)  |
| <b>3</b>                                                                                   | 267 (81.7) | 86 (85.1)                       | 360 (87.4)  | 151 (77.0)   | 92 (78.6)                       | 290 (81.9) |
| <b>Pentavalent fully vaccinated for age<sup>c</sup></b>                                    |            |                                 |             |              |                                 |            |
| <b>&lt; 1 year old</b>                                                                     | 149 (88.7) | 43 (91.5)                       | 223 (93.7)  | 65 (74.7)    | 42 (80.8)                       | 123 (81.5) |
| <b>≥ 1 year old</b>                                                                        | 159 (100)  | 54 (100)                        | 173 (99.4)  | 104 (95.4)   | 60 (92.3)                       | 191 (94.1) |
| <b>≥ 1 measles dose received (among children &gt;10.5 months)</b>                          | 175 (91.6) | 59 (93.7)                       | 201 (97.1)  | 91 (74.0)    | 51 (69.9)                       | 183 (79.9) |
| <b>Weight-for-age (WHO) z scores</b>                                                       |            |                                 |             |              |                                 |            |
| <b>&gt; -2 z scores</b>                                                                    | 222 (67.9) | 66 (65.4)                       | 348 (83.3)  | 99 (50.0)    | 52 (44.1)                       | 243 (68.6) |
| <b>-3 ≤ z scores ≤ -2</b>                                                                  | 80 (24.5)  | 26 (25.7)                       | 51 (12.2)   | 66 (33.3)    | 44 (37.3)                       | 87 (24.6)  |
| <b>&lt; -3 z scores</b>                                                                    | 25 (7.7)   | 9 (8.9)                         | 19 (4.6)    | 33 (16.7)    | 22 (18.6)                       | 24 (6.8)   |
| <b>Prematurity (gestational age &lt; 37 weeks)</b>                                         | 11 (3.5)   | 5 (5.1)                         | 6 (1.5)     | 19 (9.6)     | 11 (9.3)                        | 17 (4.8)   |
| <b>Prior diagnosis with wheeze or asthma</b>                                               | 6 (1.8)    | 0 (0.0)                         | 2 (0.5)     | 94 (47.5)    | 56 (47.5)                       | 47 (13.3)  |
| <b>Antibiotic Use</b>                                                                      |            |                                 |             |              |                                 |            |
| <b>Serum antibiotic activity</b>                                                           | 84 (28.3)  | 21 (22.8)                       | 9 (2.5)     | 34 (17.3)    | 24 (20.7)                       | 1 (0.3)    |
| <b>Parental report of antibiotics</b>                                                      | 108 (63.5) | 30 (56.6)                       | 47 (60.3)   | 78 (67.8)    | 48 (64.0)                       | 10 (58.8)  |
| <b>Antibiotics administered at study hospital prior to specimen collection<sup>d</sup></b> | 29 (8.9)   | 11 (10.9)                       | n/a         | 12 (6.1)     | 10 (8.5)                        | n/a        |
| <b>Antibiotic pretreatment prior to specimen collection<sup>e</sup></b>                    | 87 (28.9)  | 24 (25.8)                       | 9 (2.4)     | 39 (19.7)    | 28 (23.7)                       | 1 (0.3)    |

Abbreviations: CXR, chest radiograph; IQR, interquartile range.

a. CXR-positive cases: presence of alveolar consolidation and/or other infiltrates on chest radiograph.

b. Respiratory tract illness defined as 1) cough and/or runny nose or 2) at least 1 of ear discharge, wheezing, or difficulty breathing in the presence of either a temperature of  $\geq 38.0^{\circ}\text{C}$  within past 48 hours or a history of sore throat. Matlab was only enrolling 'healthy' controls for first 7 months of study (Jan 1, 2012 – Aug 8, 2012), however 25% of controls enrolled during these 7 months still met the criteria for 'RTI.'

c. Numbers reflect children who received Pentavalent vaccine (diphtheria-tetanus-pertussis- Haemophilus influenzae type b-Hepatitis B vaccine). An additional 32 children, including 6 cases and 26 controls, received DTP-only, not Penta. For children  $< 1$  year, DTP fully vaccinated defined as: received at least one dose and up-to-date for age based on the child's age at enrollment, doses received, and country schedule (allowing 4-week window each for dose). For children  $> 1$  year, defined as 3+ doses.

d. Reported by clinician.

e. Presence of antibiotics by serum, antibiotics at the referral hospital, clinician report of antibiotics prior to specimen collection or antibiotics prior to specimen collection based on time of specimen collection and time of antibiotic administration. Only criterion applicable to controls is serum.
