# Supplementary material for: The Etiology of Childhood Pneumonia in Bangladesh: Findings From the Pneumonia Etiology Research for Child Health (PERCH) Study
Source: PubMed Central journal article supplement — Pediatr Infect Dis J. 2021 Aug 25;40(9):S79–90. doi: 10.1097/INF.0000000000002648 (PMC8448409; doi:10.1097/inf.0000000000002648), 2021-08-25
Supplement: inf-40-s79-s003.pdf [file inf-40-s79-s003.pdf]

**Supplemental Digital Content 3, Table. Co-Detection of Organisms in NP/OP PCR Specimens Collected from both Cases and Controls, by CXR status**

|                                                | All Cases<br>N=525 | CXR-positive<br>Cases<br>N=219 | All<br>Controls<br>N=771 | All Cases vs<br>All Controls | CXR-positive<br>Cases vs<br>All Controls |
|------------------------------------------------|--------------------|--------------------------------|--------------------------|------------------------------|------------------------------------------|
| Mean (SD) number of organisms, any positivity  | 3.95 (1.51)        | 3.99 (1.53)                    | 4.06 (1.42)              |                              |                                          |
| Median (IQR)                                   | 4.0 (3.0, 5.0)     | 4.0 (3.0, 5.0)                 | 4.0 (3.0, 5.0)           |                              |                                          |
| 0                                              | 3 (0.6)            | 1 (0.5)                        | 1 (0.1)                  | 0.0757                       | 0.1403                                   |
| 1                                              | 23 (4.4)           | 9 (4.1)                        | 24 (3.1)                 |                              |                                          |
| 2                                              | 71 (13.5)          | 33 (15.1)                      | 77 (10.0)                |                              |                                          |
| 3                                              | 100 (19.0)         | 39 (17.8)                      | 166 (21.5)               |                              |                                          |
| 4                                              | 328 (62.5)         | 137 (62.6)                     | 503 (65.2)               |                              |                                          |
| Mean (SD) number of organisms, above threshold | 2.74 (1.38)        | 2.72 (1.41)                    | 2.62 (1.39)              |                              |                                          |
| Median (IQR)                                   | 3.0 (2.0, 4.0)     | 3.0 (2.0, 4.0)                 | 2.0 (2.0, 3.0)           |                              |                                          |
| 0                                              | 13 (2.5)           | 7 (3.2)                        | 34 (4.4)                 | 0.6150                       | 0.7788                                   |
| 1                                              | 85 (16.2)          | 35 (16.0)                      | 129 (16.7)               |                              |                                          |
| 2                                              | 150 (28.6)         | 66 (30.1)                      | 226 (29.3)               |                              |                                          |
| 3                                              | 135 (25.7)         | 50 (22.8)                      | 195 (25.3)               |                              |                                          |
| 4                                              | 142 (27.0)         | 61 (27.9)                      | 187 (24.3)               |                              |                                          |
| Pathogen patterns, any positivity              |                    |                                |                          |                              |                                          |
| Single bacteria                                | 8 (1.5)            | 6 (2.7)                        | 15 (1.9)                 | <.0001                       | <.0001                                   |
| 2 or more bacteria                             | 13 (2.5)           | 7 (3.2)                        | 72 (9.3)                 |                              |                                          |
| Single virus                                   | 16 (3.0)           | 3 (1.4)                        | 11 (1.4)                 |                              |                                          |
| 2 or more viruses                              | 29 (5.5)           | 18 (8.2)                       | 7 (0.9)                  |                              |                                          |
| Bacterial-Viral                                | 456 (86.9)         | 184 (84.0)                     | 665 (86.3)               |                              |                                          |
| Pathogen patterns, above threshold             |                    |                                |                          |                              |                                          |
| Single bacteria                                | 19 (3.6)           | 11 (5.0)                       | 76 (9.9)                 | <.0001                       | <.0001                                   |
| 2 or more bacteria                             | 9 (1.7)            | 4 (1.8)                        | 51 (6.6)                 |                              |                                          |
| Single virus                                   | 68 (13.0)          | 26 (11.9)                      | 56 (7.3)                 |                              |                                          |
| 2 or more viruses                              | 80 (15.2)          | 40 (18.3)                      | 37 (4.8)                 |                              |                                          |
| Bacterial-Viral                                | 336 (64.0)         | 131 (59.8)                     | 517 (67.1)               |                              |                                          |

Analysis population was restricted to cases and controls with available NPPCR data. P-values are from logistic regression adjusted for site and age (m).

NP/OP PCR thresholds: *P. jirovecii*, 4.0 log<sub>10</sub> copies/mL; *H. influenzae*, 5.9 log<sub>10</sub> copies/mL; CMV, 4.9 log<sub>10</sub> copies/mL; *S. pneumoniae*, 6.9 log<sub>10</sub> copies/mL).
