# Supplementary material for: The Etiology of Childhood Pneumonia in Bangladesh: Findings From the Pneumonia Etiology Research for Child Health (PERCH) Study
Source: PubMed Central journal article supplement — Pediatr Infect Dis J. 2021 Aug 25;40(9):S79–90. doi: 10.1097/INF.0000000000002648 (PMC8448409; doi:10.1097/inf.0000000000002648), 2021-08-25
Supplement: inf-40-s79-s004.pdf [file inf-40-s79-s004.pdf]

Supplemental Digital Content 4, Table. Detection of Organisms by PCR in NP/OP and Whole Blood Specimens from Cases and Controls

|                                                                                       |            |                    |              | Odds Ratio (95% CI)        |                                     |
|---------------------------------------------------------------------------------------|------------|--------------------|--------------|----------------------------|-------------------------------------|
|                                                                                       | All Cases  | CXR-positive Cases | All Controls | All Cases vs. All Controls | CXR-positive Cases vs. All Controls |
| <b>NP/OP PCR</b>                                                                      |            |                    |              |                            |                                     |
| <b>Pathogen</b>                                                                       |            |                    |              |                            |                                     |
| Any pathogen                                                                          | 522 (99.4) | 218 (99.5)         | 770 (99.9)   | 0.15 (0.02, 1.48)          | 0.20 (0.01, 3.45)                   |
| Any pathogen, with thresholds applied                                                 | 512 (97.5) | 212 (96.8)         | 737 (95.6)   | 1.28 (0.62, 2.63)          | 1.12 (0.44, 2.84)                   |
| <b>Bacteria</b>                                                                       |            |                    |              |                            |                                     |
| Any bacteria                                                                          | 477 (90.9) | 197 (90.0)         | 752 (97.5)   | 0.46 (0.24, 0.87)          | 0.54 (0.24, 1.19)                   |
| Any bacteria, with thresholds applied for <i>S. pneumoniae</i> , <i>H. influenzae</i> | 364 (69.3) | 146 (66.7)         | 644 (83.5)   | 0.84 (0.51, 1.38)          | 0.57 (0.30, 1.11)                   |
| <i>S. pneumoniae</i>                                                                  | 354 (67.4) | 148 (67.6)         | 633 (82.1)   | 0.48 (0.35, 0.66)          | 0.55 (0.37, 0.83)                   |
| >6.9 log <sub>10</sub> copies/ml                                                      | 68 (13.0)  | 32 (14.6)          | 82 (10.6)    | 1.71 (1.15, 2.56)          | 2.28 (1.37, 3.80)                   |
| Among those with >6.9 log <sub>10</sub> copies/ml                                     |            |                    |              |                            |                                     |
| PCV13-type                                                                            | 29 (42.6)  | 13 (40.6)          | 43 (52.4)    | 1.26 (0.72, 2.21)          | 1.54 (0.75, 3.18)                   |
| Non PCV13-type                                                                        | 37 (54.4)  | 19 (59.4)          | 45 (54.9)    | 1.65 (0.99, 2.76)          | 2.18 (1.15, 4.10)                   |
| PCV10-type                                                                            | 26 (38.2)  | 11 (34.4)          | 37 (45.1)    | 1.29 (0.71, 2.35)          | 1.53 (0.69, 3.36)                   |
| Non PCV10-type                                                                        | 40 (58.8)  | 21 (65.6)          | 51 (62.2)    | 1.57 (0.96, 2.56)          | 2.08 (1.14, 3.81)                   |
| <i>H. influenzae</i>                                                                  | 291 (55.4) | 134 (61.2)         | 496 (64.3)   | 0.77 (0.59, 1.01)          | 1.0 (0.69, 1.43)                    |
| <i>H. influenzae</i> not type b                                                       | 287 (54.7) | 132 (60.3)         | 483 (62.6)   | 0.77 (0.59, 1.01)          | 1.00 (0.69, 1.44)                   |
| >5.9 log <sub>10</sub> copies/ml                                                      | 127 (24.2) | 58 (26.5)          | 210 (27.2)   | 1.02 (0.75, 1.38)          | 1.17 (0.78, 1.76)                   |
| <i>H. influenzae</i> type b                                                           | 4 (0.8)    | 2 (0.9)            | 13 (1.7)     | 0.59 (0.18, 1.98)          | 0.81 (0.16, 3.97)                   |
| >5.9 log <sub>10</sub> copies/ml                                                      | 2 (0.4)    | 1 (0.5)            | 4 (0.5)      | 0.82 (0.14, 4.97)          | 0.79 (0.08, 7.80)                   |
| <i>S. aureus</i>                                                                      | 87 (16.6)  | 33 (15.1)          | 167 (21.7)   | 0.56 (0.40, 0.79)          | 0.47 (0.29, 0.75)                   |
| <i>B. pertussis</i>                                                                   | 1 (0.2)    | 0 (0.0)            | 0 (0.0)      | -- <sup>a</sup>            | -- <sup>a</sup>                     |
| <i>C. pneumoniae</i>                                                                  | 2 (0.4)    | 0 (0.0)            | 4 (0.5)      | 0.82 (0.10, 7.09)          | --                                  |
| <i>M. catarrhalis</i>                                                                 | 260 (49.5) | 109 (49.8)         | 507 (65.8)   | 0.45 (0.34, 0.59)          | 0.46 (0.32, 0.66)                   |
| <i>M. pneumoniae</i>                                                                  | 7 (1.3)    | 3 (1.4)            | 13 (1.7)     | 0.79 (0.26, 2.47)          | 0.98 (0.25, 3.82)                   |
| Salmonella species                                                                    | 0 (0.0)    | 0 (0.0)            | 1 (0.1)      | -- <sup>a</sup>            | -- <sup>a</sup>                     |
| Legionella                                                                            | 0 (0.0)    | 0 (0.0)            | 0 (0.0)      | -- <sup>a</sup>            | -- <sup>a</sup>                     |
| <b>Fungi</b>                                                                          |            |                    |              |                            |                                     |
| <i>P. jirovecii</i>                                                                   | 28 (5.3)   | 11 (5.0)           | 43 (5.6)     | 0.76 (0.42, 1.40)          | 0.76 (0.34, 1.71)                   |
| >4 log <sub>10</sub> copies/ml                                                        | 13 (2.5)   | 5 (2.3)            | 14 (1.8)     | 0.74 (0.29, 1.92)          | 0.93 (0.28, 3.14)                   |
| <b>Virus</b>                                                                          |            |                    |              |                            |                                     |

|                                            |            |                    |              | Odds Ratio (95% CI)        |                                     |
|--------------------------------------------|------------|--------------------|--------------|----------------------------|-------------------------------------|
|                                            | All Cases  | CXR-positive Cases | All Controls | All Cases vs. All Controls | CXR-positive Cases vs. All Controls |
| <b>NP/OP PCR</b>                           |            |                    |              |                            |                                     |
| Any virus                                  | 501 (95.4) | 205 (93.6)         | 683 (88.6)   | 1.01 (0.59, 1.75)          | 0.80 (0.40, 1.61)                   |
| Any virus, with thresholds applied for CMV | 484 (92.2) | 197 (90.0)         | 610 (79.1)   | 1.24 (0.75, 2.03)          | 1.08 (0.56, 2.07)                   |
| Adenovirus                                 | 61 (11.6)  | 21 (9.6)           | 134 (17.4)   | 0.69 (0.47, 1.00)          | 0.53 (0.31, 0.91)                   |
| CMV                                        | 336 (64.0) | 147 (67.1)         | 480 (62.3)   | 1.20 (0.91, 1.60)          | 1.39 (0.95, 2.05)                   |
| >4.9 log <sub>10</sub> copies/ml           | 160 (30.5) | 65 (29.7)          | 224 (29.1)   | 0.98 (0.72, 1.34)          | 0.99 (0.66, 1.48)                   |
| Coronavirus 43                             | 9 (1.7)    | 2 (0.9)            | 30 (3.9)     | 0.53 (0.22, 1.24)          | 0.25 (0.05, 1.17)                   |
| Coronavirus 63                             | 6 (1.1)    | 4 (1.8)            | 21 (2.7)     | 0.35 (0.12, 0.99)          | 0.53 (0.16, 1.76)                   |
| Coronavirus HKU                            | 10 (1.9)   | 7 (3.2)            | 24 (3.1)     | 0.87 (0.36, 2.10)          | 1.19 (0.43, 3.29)                   |
| Coronavirus 229                            | 13 (2.5)   | 4 (1.8)            | 20 (2.6)     | 0.52 (0.22, 1.22)          | 0.56 (0.17, 1.83)                   |
| HBOV                                       | 93 (17.7)  | 41 (18.7)          | 117 (15.2)   | 1.60 (1.14, 2.26)          | 1.59 (1.02, 2.49)                   |
| HMPV A/B                                   | 39 (7.4)   | 19 (8.7)           | 24 (3.1)     | 4.54 (2.57, 8.03)          | 5.76 (2.89, 11.50)                  |
| Influenza A                                | 5 (1.0)    | 3 (1.4)            | 13 (1.7)     | 1.07 (0.34, 3.41)          | 1.10 (0.26, 4.62)                   |
| Influenza B                                | 4 (0.8)    | 1 (0.5)            | 4 (0.5)      | 1.63 (0.34, 7.81)          | 1.51 (0.16, 14.45)                  |
| Influenza C                                | 0 (0.0)    | 0 (0.0)            | 4 (0.5)      | -- <sup>a</sup>            | -- <sup>a</sup>                     |
| Parainfluenza 1                            | 20 (3.8)   | 10 (4.6)           | 7 (0.9)      | 10.06 (3.68, 27.48)        | 7.97 (2.42, 26.28)                  |
| Parainfluenza 2                            | 7 (1.3)    | 2 (0.9)            | 16 (2.1)     | 0.59 (0.21, 1.66)          | 0.40 (0.08, 1.99)                   |
| Parainfluenza 3                            | 21 (4.0)   | 10 (4.6)           | 40 (5.2)     | 1.06 (0.58, 1.94)          | 1.30 (0.60, 2.83)                   |
| Parainfluenza 4                            | 17 (3.2)   | 7 (3.2)            | 21 (2.7)     | 2.08 (1.00, 4.33)          | 1.83 (0.68, 4.91)                   |
| PV/EV                                      | 66 (12.6)  | 24 (11.0)          | 92 (11.9)    | 2.22 (1.49, 3.29)          | 1.56 (0.90, 2.70)                   |
| Rhinovirus                                 | 192 (36.6) | 78 (35.6)          | 196 (25.4)   | 3.01 (2.24, 4.05)          | 2.48 (1.68, 3.68)                   |
| RSV                                        | 146 (27.8) | 55 (25.1)          | 25 (3.2)     | 17.94 (10.99, 29.27)       | 12.92 (7.33, 22.78)                 |
| <b>Whole Blood PCR</b>                     |            |                    |              |                            |                                     |
| <i>S. pneumoniae</i>                       | 5 (1.0)    | 1 (0.5)            | 6 (0.8)      | 1.08 (0.32, 3.57)          | 0.66 (0.08, 5.52)                   |
| ≥2.2 log <sub>10</sub> copies/ml           | 2 (0.4)    | 1 (0.5)            | 0 (0.0)      | -- <sup>a</sup>            | -- <sup>a</sup>                     |

Abbreviations: HBOV, Human bocavirus; CMV, cytomegalovirus; CXR, chest x-ray; HMPV, Human metapneumovirus A/B; NP/OP, nasopharyngeal/oropharyngeal; PCV, pneumococcal conjugate vaccine; PV/EV, Parechovirus/Enterovirus; RSV, Respiratory syncytial virus A/B.

NP/OP PCR odds ratio adjusted for age in months, site, and all other pathogens detected on NP/OP PCR. Whole blood PCR odds ratios adjusted for age in months and site.

a. Odd ratios could not be calculated due to zero cells.

NP/OP PCR thresholds: *P. jirovecii*, 4.0 log<sub>10</sub> copies/mL; *H. influenzae*, 5.9 log<sub>10</sub> copies/mL; CMV, 4.9 log<sub>10</sub> copies/mL; *S. pneumoniae*, 6.9 log<sub>10</sub> copies/mL).
