# Supplementary material for: The Etiology of Childhood Pneumonia in Bangladesh: Findings From the Pneumonia Etiology Research for Child Health (PERCH) Study
Source: PubMed Central journal article supplement — Pediatr Infect Dis J. 2021 Aug 25;40(9):S79–90. doi: 10.1097/INF.0000000000002648 (PMC8448409; doi:10.1097/inf.0000000000002648), 2021-08-25
Supplement: inf-40-s79-s005.pdf [file inf-40-s79-s005.pdf]

Supplemental Digital Content 5, Table. Comparison of NP/OP PCR results between sites

|                                         | All Cases       |                |                              |               | Controls        |                |                              |                  |
|-----------------------------------------|-----------------|----------------|------------------------------|---------------|-----------------|----------------|------------------------------|------------------|
|                                         | Matlab<br>n (%) | Dhaka<br>n (%) | OR (95% CI)*<br>(ref=Matlab) | p-value*      | Matlab<br>n (%) | Dhaka<br>n (%) | OR (95% CI)*<br>(ref=Matlab) | p-value*         |
| <b>Bacteria</b>                         |                 |                |                              |               |                 |                |                              |                  |
| <i>S. pneumoniae</i>                    |                 |                |                              |               |                 |                |                              |                  |
| NP/OP, any positivity                   | 235 (71.9)      | 119 (60.1)     | <b>0.59 (0.41-0.86)</b>      | <b>0.0055</b> | 336 (80.4)      | 295 (84.3)     | 1.31 (0.90-1.91)             | 0.16             |
| NP/OP, >6.9 log <sub>10</sub> copies/ml | 46 (14.1)       | 22 (11.1)      | 0.76 (0.44-1.31)             | 0.33          | 40 (9.6)        | 42 (12.0)      | 1.29 (0.81-2.04)             | 0.28             |
| <i>H. influenzae</i>                    | 176 (53.8)      | 115 (58.1)     | 1.19 (0.83-1.70)             | 0.34          | 256 (61.2)      | 238 (68.0)     | 1.34 (1.00-1.81)             | 0.052            |
| <i>S. aureus</i>                        | 43 (13.1)       | 44 (22.2)      | <b>1.89 (1.19-3.00)</b>      | <b>0.0073</b> | 81 (19.4)       | 85 (24.3)      | 1.33 (0.95-1.88)             | 0.10             |
| <i>P. jirovecii</i>                     | 16 (4.9)        | 12 (6.1)       | 1.25 (0.58-2.71)             | 0.56          | 33 (7.9)        | 10 (2.9)       | <b>0.34 (0.17-0.71)</b>      | <b>0.0037</b>    |
| <b>Viruses</b>                          |                 |                |                              |               |                 |                |                              |                  |
| CMV                                     | 209 (63.9)      | 127 (64.1)     | 1.01 (0.70-1.46)             | 0.96          | 281 (67.2)      | 197 (56.3)     | <b>0.63 (0.47-0.84)</b>      | <b>0.0019</b>    |
| CMV > 4.9 log <sub>10</sub> copies/mL   | 32 (9.8)        | 14 (7.1)       | 0.78 (0.53-1.15)             | 0.22          | 57 (13.6)       | 22 (6.3)       | <b>0.52 (0.38-0.72)</b>      | <b>&lt;.0001</b> |
| HMPV A/B                                | 26 (8.0)        | 13 (6.6)       | 0.81 (0.41-1.62)             | 0.56          | 20 (4.8)        | 4 (1.1)        | <b>0.23 (0.08-0.68)</b>      | <b>0.0078</b>    |
| Parainfluenza 1                         | 16 (4.9)        | 4 (2.0)        | 0.4 (0.13-1.22)              | 0.11          | 5 (1.2)         | 2 (0.6)        | 1.37 (0.49-3.83)             | 0.54             |
| Parainfluenza 2                         | 3 (0.9)         | 4 (2.0)        | 2.23 (0.49-10.1)             | 0.30          | 7 (1.7)         | 8 (2.3)        | 1.37 (0.49-3.83)             | 0.54             |
| Parainfluenza 3                         | 7 (2.1)         | 14 (7.1)       | <b>3.48 (1.38-8.77)</b>      | <b>0.0083</b> | 24 (5.7)        | 15 (4.3)       | 0.74 (0.38-1.42)             | 0.36             |
| Parainfluenza 4                         | 10 (3.1)        | 7 (3.5)        | 1.16 (0.43-3.10)             | 0.76          | 11 (2.6)        | 10 (2.9)       | 1.09 (0.46-2.59)             | 0.89             |
| PV/EV                                   | 48 (14.7)       | 18 (9.1)       | 0.58 (0.33-1.03)             | 0.064         | 51 (12.2)       | 40 (11.4)      | 0.93 (0.60-1.44)             | 0.74             |
| RSV                                     | 109 (33.3)      | 37 (18.7)      | <b>0.46 (0.30-0.70)</b>      | <b>0.0003</b> | 20 (4.8)        | 6 (1.7)        | <b>0.29 (0.11-0.78)</b>      | <b>0.014</b>     |

Abbreviations: CMV, cytomegalovirus; HMPV, Human metapneumovirus A/B; PV/EV, Parechovirus/Enterovirus; RSV, Respiratory syncytial virus A/B.

\*Odds ratios (ORs) and p-values from unadjusted logistic regression
