# Supplementary material for: The Etiology of Childhood Pneumonia in Bangladesh: Findings From the Pneumonia Etiology Research for Child Health (PERCH) Study
Source: PubMed Central journal article supplement — Pediatr Infect Dis J. 2021 Aug 25;40(9):S79–90. doi: 10.1097/INF.0000000000002648 (PMC8448409; doi:10.1097/inf.0000000000002648), 2021-08-25

**Supplemental Digital Content 6, Figure.** RSV Seasonality by site shown as number of children with a PCR positive NP swab per month of enrollment

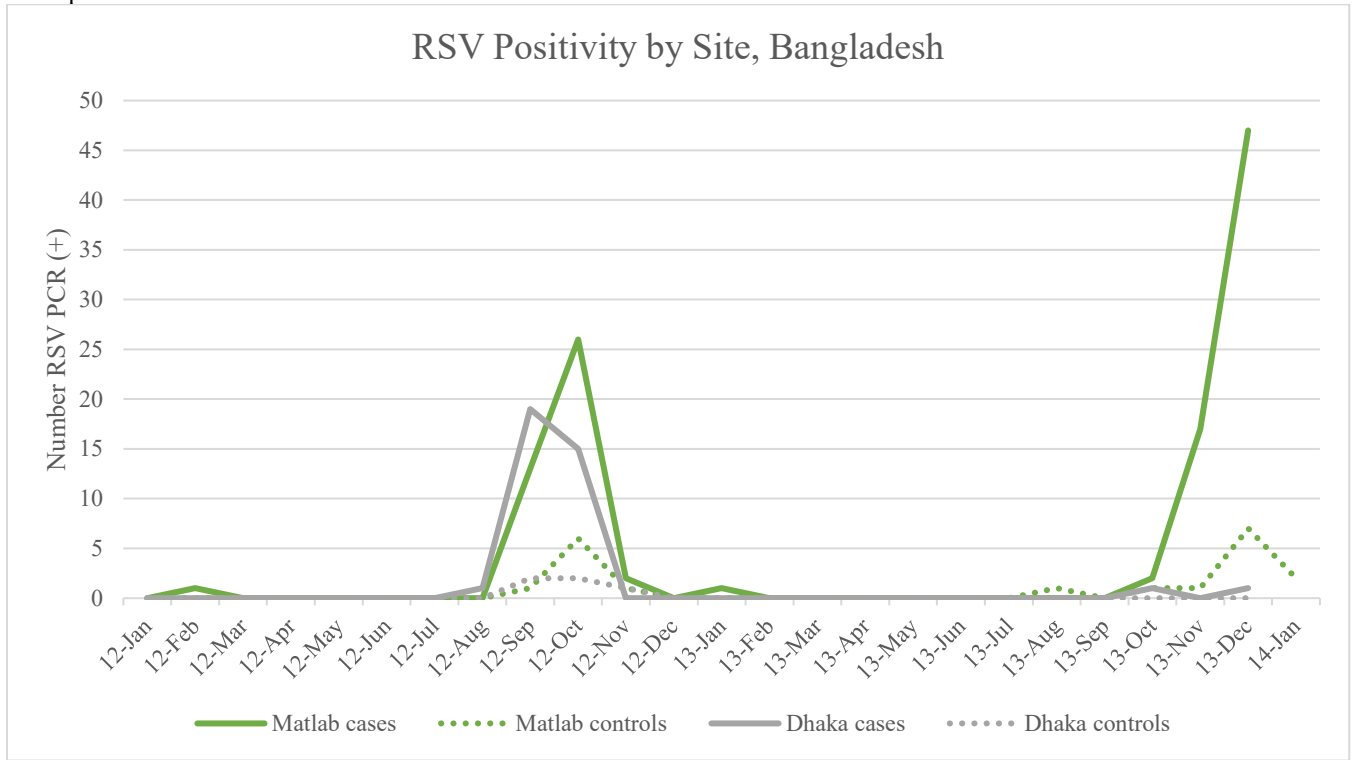

Supplement: inf-40-s79-s006.pdf [file inf-40-s79-s006.pdf]
