# Supplementary material for: The Etiology of Childhood Pneumonia in Bangladesh: Findings From the Pneumonia Etiology Research for Child Health (PERCH) Study
Source: PubMed Central journal article supplement — Pediatr Infect Dis J. 2021 Aug 25;40(9):S79–90. doi: 10.1097/INF.0000000000002648 (PMC8448409; doi:10.1097/inf.0000000000002648), 2021-08-25
Supplement: inf-40-s79-s007.pdf [file inf-40-s79-s007.pdf]

Supplemental Digital Content 7, Table. Integrated etiology results

|                                    | All Cases                   | CXR+ Cases                  |
|------------------------------------|-----------------------------|-----------------------------|
| Aetiology                          | Etiologic Fraction (95% CI) | Etiologic Fraction (95% CI) |
| <b>Bacteria</b>                    |                             |                             |
| <i>B. pertussis</i>                | 0.1 (0.0, 0.6)              | 0.1 (0.0, 0.9)              |
| <i>C. pneumoniae</i>               | 0.1 (0.0, 0.6)              | 0.1 (0.0, 0.9)              |
| Enterobacteriaceae                 | 1.0 (0.0, 3.7)              | 3.0 (0.5, 10.0)             |
| <i>H. influenzae</i>               | 0.5 (0.0, 2.2)              | 1.0 (0.0, 5.0)              |
| Type b                             | 0.2 (0.0, 1)                | 0.1 (0.0, 0.9)              |
| Non-b                              | 0.3 (0.0, 1.9)              | 0.9 (0.0, 4.6)              |
| Legionella species                 | 0.1 (0.0, 0.4)              | 0.8 (0.0, 5.9)              |
| <i>M. catarrhalis</i>              | 0.3 (0.0, 2.4)              | 1.2 (0.0, 6.8)              |
| <i>M. pneumoniae</i>               | 0.1 (0.0, 0.7)              | 0.4 (0.0, 1.8)              |
| <i>M. tuberculosis</i>             | 2.1 (0.3, 5.7)              | 3.6 (0.5, 11.0)             |
| <i>N. meningitidis</i>             | 0.2 (0.0, 1.3)              | 0.6 (0.0, 3.7)              |
| Non-fermenting gram-negative rods  | 0.4 (0.0, 2.8)              | 1.4 (0.0, 7.8)              |
| Other streptococci and enterococci | 0.3 (0.0, 2.3)              | 1.3 (0.0, 6.8)              |
| <i>S. aureus</i>                   | 0.2 (0.0, 1.2)              | 0.4 (0.0, 2.3)              |
| <i>S. pneumoniae</i>               | 0.4 (0.0, 2.0)              | 1.8 (0.0, 5.9)              |
| PCV13 VT                           | 0.1 (0.0, 1.0)              | 0.5 (0.0, 2.7)              |
| PCV13 NVT                          | 0.3 (0.0, 1.7)              | 1.3 (0.0, 5.0)              |
| Salmonella species                 | 1.2 (0.1, 3.4)              | 1.7 (0.5, 5.9)              |
| <b>Fungi</b>                       |                             |                             |
| <i>Candida</i> species             | 0.3 (0.0, 2.5)              | 1.4 (0.0, 7.8)              |
| <i>P. jirovecii</i>                | 0.2 (0.0, 0.9)              | 0.5 (0.0, 1.8)              |
| <b>Viruses</b>                     |                             |                             |
| Adenovirus                         | 0.4 (0.0, 2.4)              | 0.5 (0.0, 2.7)              |
| Bocavirus                          | 2.0 (0.0, 6.2)              | 2.1 (0.0, 7.8)              |
| CMV                                | 1.8 (0.0, 5.9)              | 3.0 (0.0, 8.7)              |
| Coronavirus                        | 0.1 (0.0, 1.0)              | 0.3 (0.0, 1.8)              |
| HMPV A/B                           | 7.3 (3.8, 11.5)             | 7.7 (3.7, 12.8)             |
| Influenza                          | 0.3 (0.0, 1.4)              | 0.6 (0.0, 2.3)              |
| A                                  | 0.1 (0.0, 0.9)              | 0.2 (0.0, 1.4)              |
| B                                  | 0.2 (0.0, 0.9)              | 0.3 (0.0, 1.4)              |
| C                                  | 0.1 (0.0, 0.4)              | 0.1 (0.0, 0.9)              |
| Parainfluenza                      | 5.8 (2.6, 9.7)              | 5.7 (1.8, 10.5)             |
| 1                                  | 3.5 (1.4, 6.2)              | 2.3 (0.0, 5.0)              |
| 2                                  | 0.7 (0.0, 2.3)              | 0.3 (0.0, 1.4)              |
| 3                                  | 0.8 (0.0, 3.2)              | 2.1 (0.0, 5.5)              |
| 4                                  | 0.8 (0.0, 2.9)              | 1.1 (0.0, 3.7)              |
| PV/EV                              | 10.1 (5.6, 15.4)            | 4.1 (0.0, 8.2)              |
| Rhinovirus                         | 30.4 (23.4, 38.1)           | 22.6 (12.8, 33.3)           |
| RSV A/B                            | 33.5 (27.2, 40.9)           | 31.2 (24.7, 39.3)           |
| Not otherwise specified            | 0.9 (0.0, 5.8)              | 3.1 (0.0, 14.6)             |
| <b>Summary Estimates</b>           |                             |                             |
| Bacteria**                         | 4.7 (1.6, 9.4)              | 13.7 (5.5, 25.1)            |
| Viruses                            | 91.7 (84.9, 96.4)           | 77.7 (65.3, 88.6)           |

Abbreviation: CI, credible interval, PCV13 VT, pneumococcal conjugate vaccine-type, PV/EV, parechovirus/enterovirus; CMV, cytomegalovirus; RSV, respiratory syncytial virus.

\*\*The bacteria summary estimate excludes *M. tuberculosis*.

CXR+ defined as consolidation and/or other infiltrate on chest radiograph.

For pathogens presented grouped in Figure 3 (e.g., Parainfluenza virus types 1, 2, 3 and 4), both grouped and subspecies level results are presented here, with subspecies level results in gray.

Not Otherwise Specified represents pathogens not tested for. Other Strep includes *Streptococcus pyogenes* and *Enterococcus faecium*. Nonfermentative gram-negative rods includes Acinetobacter species and Pseudomonas species. Enterobacteriaceae includes *E. coli*, Enterobacter species, and Klebsiella species, excluding mixed gram-negative rods.
