# Supplementary material for: The Etiology of Childhood Pneumonia in Bangladesh: Findings From the Pneumonia Etiology Research for Child Health (PERCH) Study
Source: PubMed Central journal article supplement — Pediatr Infect Dis J. 2021 Aug 25;40(9):S79–90. doi: 10.1097/INF.0000000000002648 (PMC8448409; doi:10.1097/inf.0000000000002648), 2021-08-25
Supplement: inf-40-s79-s009.pdf [file inf-40-s79-s009.pdf]

Supplemental Digital Content 9, Figure

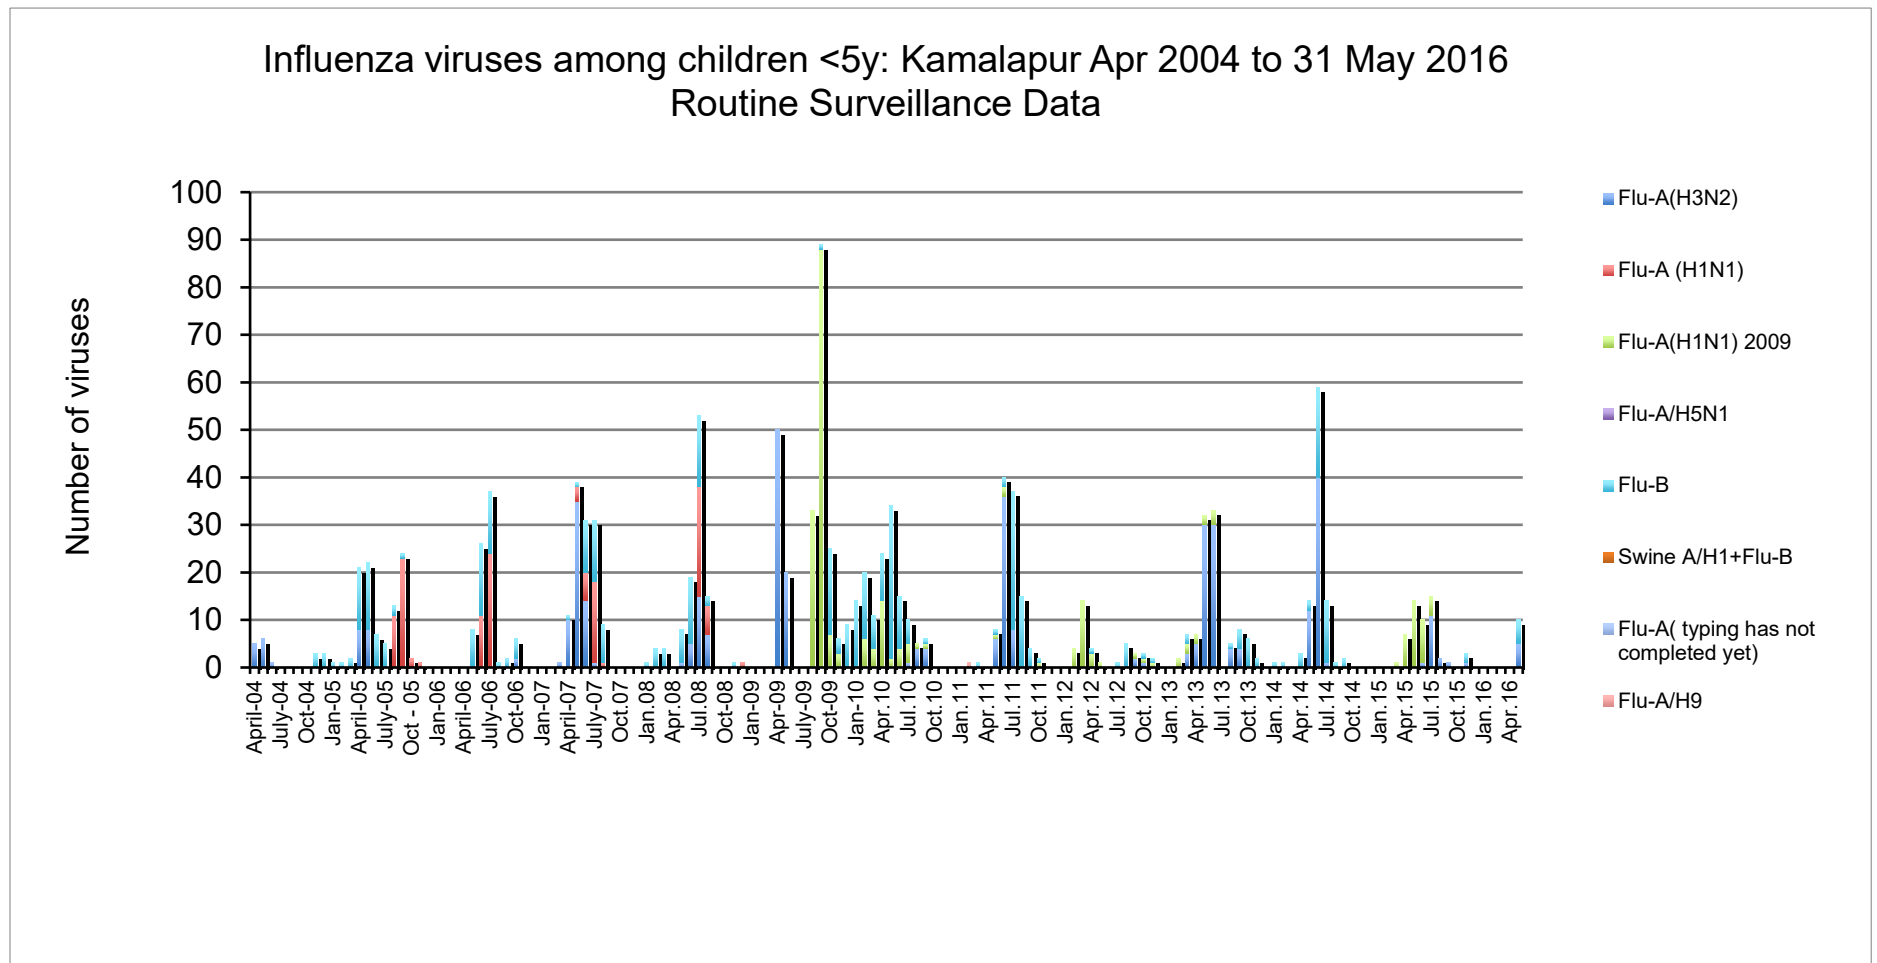

As shown by the green bars, A(H1N1)pdm09 began to spike beginning in August 2009 and then September 2009. NB: these are isolates, not incidence but the incidence data corroborate these findings). From ongoing influenza surveillance at the icddr,b Kamalapur field site, funded by a cooperative agreement between US CDC and icddr (PI: Dr. W. Abdullah Brooks).
